# Supplementary material
Source: publisher figshare collection journal article supplement (https://acs.figshare.com/ndownloader/files/5717892)
Supplement: Supplementary file 1 [file 5717892]

**1-[(*E*)-1-Butenyl]-5-methyl-1,2,3-tripropyl indene (24a):**  $^1\text{H}$  NMR (300 MHz,  $\text{CDCl}_3$ )  $\delta$  7.03-6.99 (m, 2H), 6.93-6.90 (m, 1H), 5.59 (dt,  $J = 15.6, 6.6$  Hz, 1H), 5.09 (d,  $J = 15.6$  Hz, 1H), 2.45 (t,  $J = 7.6$  Hz, 2H), 2.37 (s, 3H), 2.26-2.18 (m, 1H), 2.12-1.76 (m, 5H), 1.64-1.42 (m, 4H), 0.98 (t,  $J = 7.4$  Hz, 3H), 0.95 (t,  $J = 7.4$  Hz, 3H), 0.93 (t,  $J = 7.4$  Hz, 3H), 0.80-0.68 (m, 1H), 0.70 (t,  $J = 7.0$  Hz, 3H), 0.66-0.54 (m, 1H);  $^{13}\text{C}$ -NMR (75.5 MHz,  $\text{CDCl}_3$ )  $\delta$  148.7, 147.1, 145.8, 137.1, 135.7, 133.0, 129.5, 124.7, 122.1, 119.2, 59.5, 35.9, 28.4, 27.8, 25.9, 23.1, 22.2, 21.6, 16.7, 14.9, 14.5, 14.4, 14.0. IR (neat) 2959, 2932, 2870, 1456, 970  $\text{cm}^{-1}$ . MS (EI)  $m/z$  310 ( $\text{M}^+$ , 69.4), 267 ( $\text{M}^+ - \text{Pr}$ , 100). HRMS calcd for  $\text{C}_{23}\text{H}_{34}$  310.2660, found 310.2630.

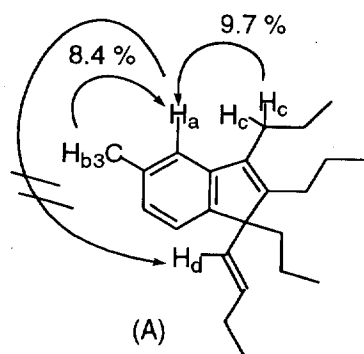

The structure of **24a** was confirmed by the NOE experiments shown in (A).

There was a NOE between  $\text{H}_a$  and  $\text{H}_b$ , and  $\text{H}_a$  and  $\text{H}_c$ , but there was no NOE between  $\text{H}_a$  and  $\text{H}_d$ .

**1-[(*E*)-1-Hexenyl]-5-methyl-1,2,3-tripentyl indene (24b):**  $^1\text{H}$  NMR (300 MHz,  $\text{CDCl}_3$ )  $\delta$  7.00-6.97 (m, 2H), 6.92-6.89 (m, 1H), 5.53 (dt,  $J = 15.6, 6.7$  Hz, 1H), 5.08 (d,

$J = 15.6$  Hz, 1H), 2.46 (t,  $J = 7.8$  Hz, 2H), 2.37 (s, 3H), 2.27-2.20 (m, 1H), 2.10-1.75 (m, 5H), 1.58-1.53 (m, 2H), 1.48-1.27 (m, 14H), 1.18-1.06 (m, 4H), 0.92-0.86 (m, 10H), 0.78 (t,  $J = 7.0$  Hz, 3H), 0.57-0.50 (m, 1H);  $^{13}\text{C}$ -NMR (75.5 MHz,  $\text{CDCl}_3$ )  $\delta$  148.5, 147.0, 145.8, 137.2, 135.6, 134.1, 124.7, 122.1, 119.1, 59.4, 33.4, 32.6, 32.2, 31.8, 28.7, 26.1, 25.7, 22.9, 22.6, 22.5, 22.4, 22.2, 21.6, 21.5, 14.0. IR (KBr) 2957, 2930, 2858, 1466, 972, 812  $\text{cm}^{-1}$ . MS (EI)  $m/z$  422 ( $\text{M}^+$ , 100), 351 ( $\text{M}^+$ -pentyl, 80.0). HRMS calcd for  $\text{C}_{31}\text{H}_{50}$  422.3913, found 422.3942.

**1-[(*E*)-1-Butenyl]-6-methyl-1,2,3-tripropyl indene (25a):**  $^1\text{H}$  NMR (300 MHz,  $\text{CDCl}_3$ )  $\delta$  7.08 (d,  $J = 7.6$  Hz, 1H), 7.00 (d,  $J = 7.6$  Hz, 1H), 6.95 (s, 1H), 5.60 (dt,  $J = 15.6, 6.3$  Hz, 1H), 5.08 (dt,  $J = 15.6, 1.5$  Hz, 1H), 2.45 (dd,  $J = 7.6$  Hz, 2H), 2.35 (s, 3H), 2.26-2.18 (m, 1H), 2.10-1.97 (m, 3H), 1.92-1.75 (m, 2H), 1.63-1.41 (m, 4H), 0.96 (t,  $J = 7.3$  Hz, 3H), 0.95 (t,  $J = 7.3$  Hz, 3H), 0.94 (t,  $J = 7.3$  Hz, 3H), 0.84-0.74 (m, 1H), 0.73 (t,  $J = 7.1$  Hz, 3H), 0.61-0.50 (m, 1H);  $^{13}\text{C}$ -NMR (75.5 MHz,  $\text{CDCl}_3$ )  $\delta$  150.2, 147.2, 143.0, 137.1, 133.5, 133.0, 129.5, 126.8, 123.3, 118.0, 59.6, 35.8, 28.3, 27.8, 25.9, 23.1, 22.1, 21.5, 16.6, 14.9, 14.5, 14.4, 14.0. IR (neat) 2960, 2932, 2872, 1456, 972  $\text{cm}^{-1}$ . MS (EI)

$m/z$  310 ( $M^+$ , 63.1), 267 ( $M^+ - \text{Pr}$ , 100). HRMS calcd for  $C_{23}H_{34}$  310.2661, found 310.2668.

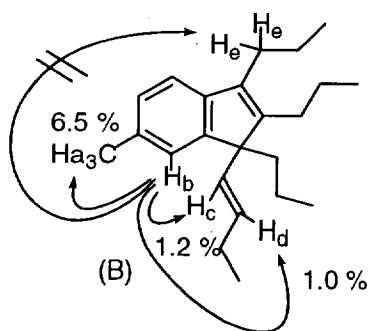

The structure of **25a** was confirmed by the NOE experiments shown in (B).

There was a NOE between  $H_b$  and  $H_a$ ,  $H_b$  and  $H_c$ , and  $H_b$  and  $H_d$  but there was no NOE between  $H_b$  and  $H_e$ .

**4,5-Dimethoxy-9,10-dipropyl phenanthrene (33):**  $^1\text{H}$  NMR (300 MHz,  $\text{CDCl}_3$ )  $\delta$

7.62 (d,  $J = 8.0$  Hz, 2H), 7.51 (t,  $J = 8.0$  Hz, 2H), 7.04 (d,  $J = 8.0$  Hz, 2H), 3.09-3.03 (m, 4H), 1.78-1.65 (m, 4H), 1.14 (t,  $J = 7.2$  Hz, 6H);  $^{13}\text{C}$ -NMR (75.5 MHz,  $\text{CDCl}_3$ )  $\delta$  157.7, 133.8, 133.7, 126.2, 118.6, 115.5, 106.5, 55.6, 31.6, 23.9, 14.8. IR (KBr) 2963, 2934, 2868, 1595, 1564, 1522, 1452, 1421, 1252, 1065, 783, 717  $\text{cm}^{-1}$ . MS (EI)  $m/z$  322 ( $M^+$ , 100), 293 ( $M^+ - \text{C}_2\text{H}_5$ , 31.5). HRMS calcd for  $\text{C}_{22}\text{H}_{26}\text{O}_2$  322.1933, found 322.1923.

The structure of **33** was confirmed by the NOE experiments shown in (C). There was a rather strong NOE between  $H_a$  and  $H_b$ , and  $H_c$  and  $H_d$ , but there was no NOE between  $H_a$  and  $H_d$ . Further, it is well accepted that H of (D) appears around 8.0~9.0 ppm.

However, such a signal was not observed in **33**.

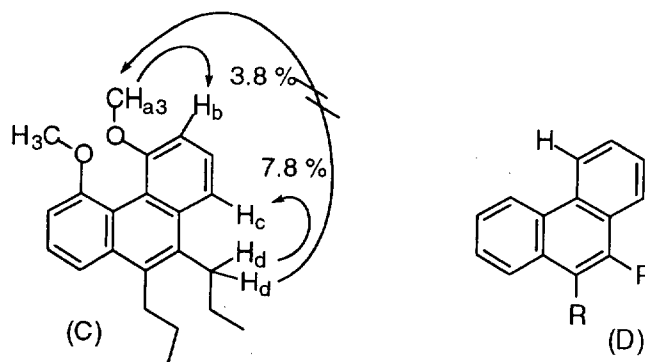

**1,5-Dimethoxy-9,10-dipropyl phenanthrene (34):**  $^1\text{H}$  NMR (300 MHz,  $\text{CDCl}_3$ )  $\delta$

9.28 (dd,  $J = 8.4, 1.0$  Hz, 1H), 7.71 (dd,  $J = 8.4, 1.0$  Hz, 1H), 7.51 (dd,  $J = 8.4, 8.0$  Hz, 1H), 7.44 (dd,  $J = 8.4, 8.0$  Hz, 1H), 7.08 (d,  $J = 8.0$  Hz, 1H), 7.05 (d,  $J = 8.0$  Hz, 1H), 4.05 (s, 3H), 3.98 (s, 3H), 3.33-3.18 (m, 2H), 3.12-3.05 (m, 2H), 1.14 (t,  $J = 7.0$  Hz, 3H), 1.09 (t,  $J = 7.0$  Hz, 3H);  $^{13}\text{C}$ -NMR (75.5 MHz,  $\text{CDCl}_3$ )  $\delta$  160.5, 160.4, 134.9, 134.4, 133.9, 126.4, 124.6, 121.2, 120.7, 117.2, 116.5, 107.9, 107.7, 100.5, 56.0, 55.7, 35.0, 31.8, 25.0, 23.9, 15.1, 14.9. IR ( $\text{CCl}_4$ ) 2959, 2932, 2870, 1576, 1454, 1427, 1246, 908,  $812\text{ cm}^{-1}$ . MS (EI)  $m/z$  322 ( $\text{M}^+$ , 100), 293 ( $\text{M}^+ - \text{C}_2\text{H}_5$ , 44.7). HRMS calcd for  $\text{C}_{22}\text{H}_{26}\text{O}_2$  322.1933, found 322.1924.

Observation of two different OMe signals in addition to the 1H signal at  $\delta$  9.28 clearly indicated that **34** has unsymmetrical structure, in contrast to the symmetrical structure of

**33.**
